# Supplementary material for: A Conserved HIV-1-Derived Peptide Presented by HLA-E Renders Infected T-cells Highly Susceptible to Attack by NKG2A/CD94-Bearing Natural Killer Cells
Source: PubMed Central journal article supplement (PMC4735451; doi:10.1371/journal.ppat.1005421), 2016-02-01

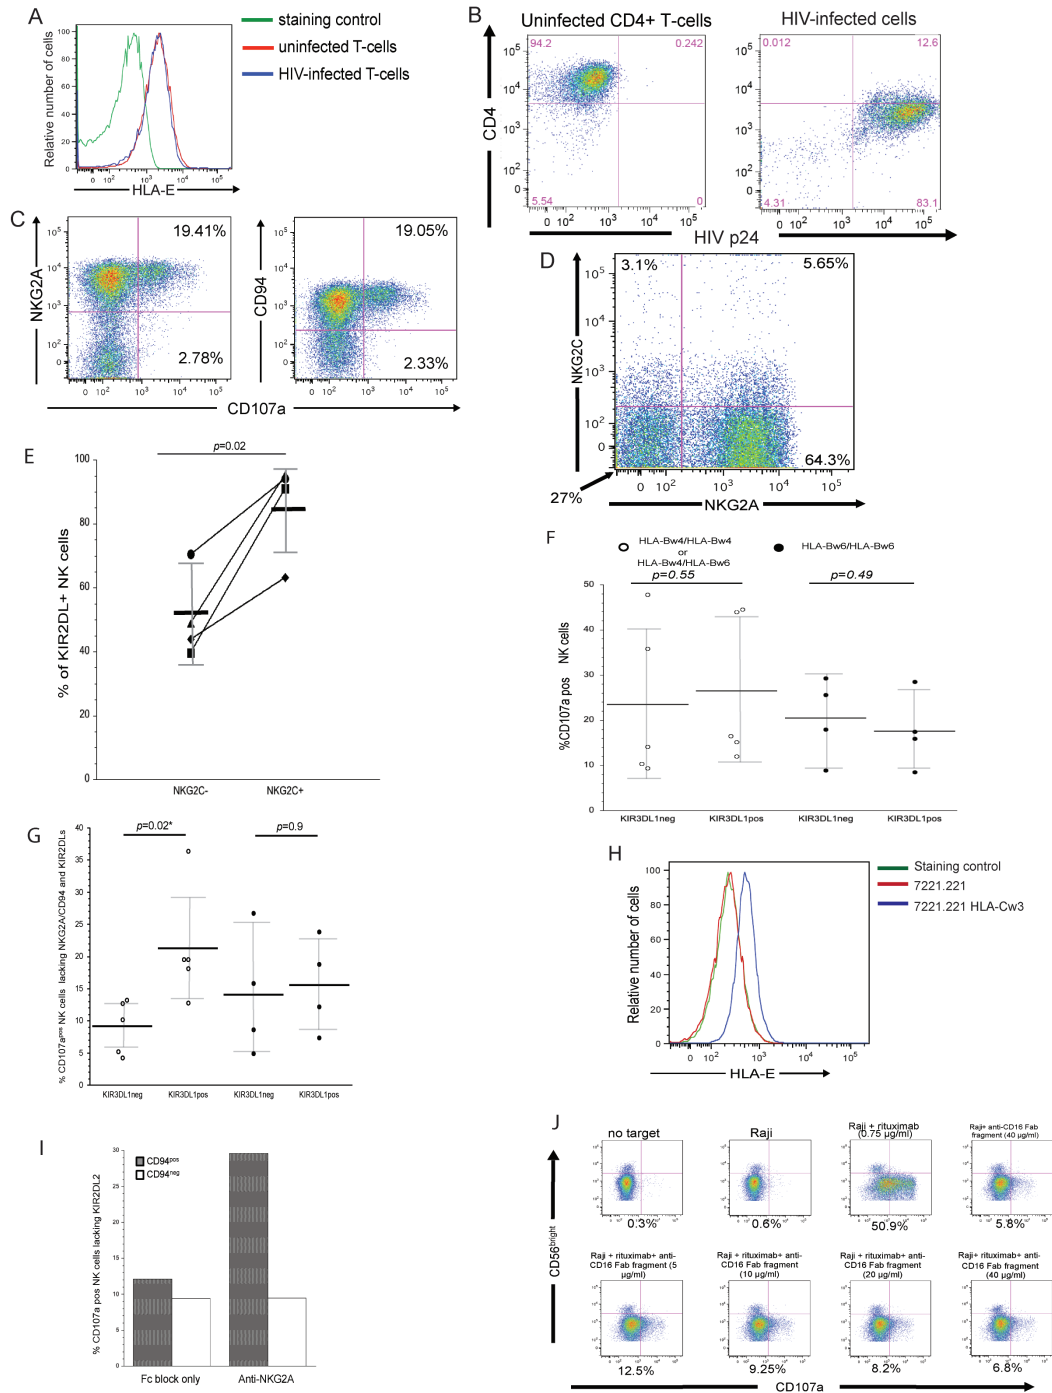

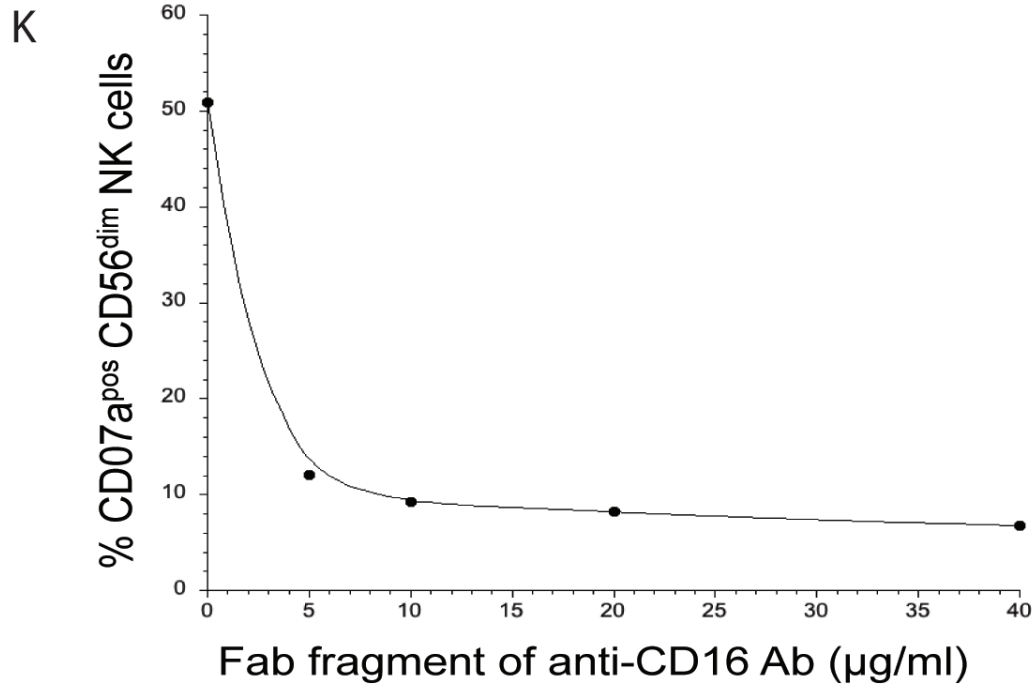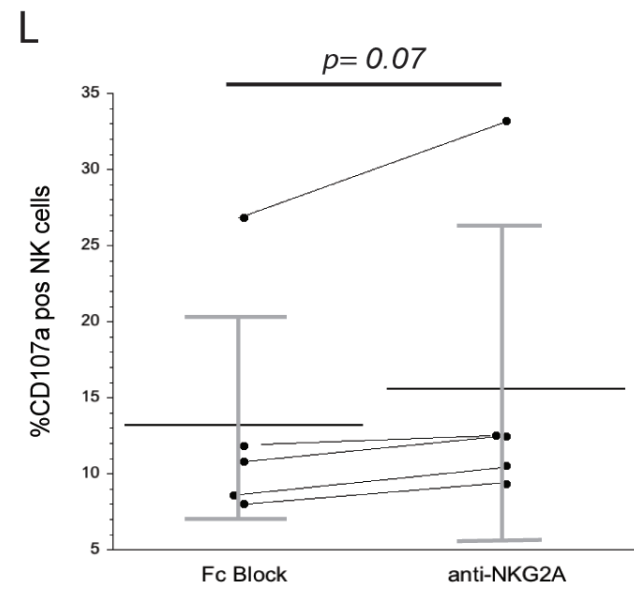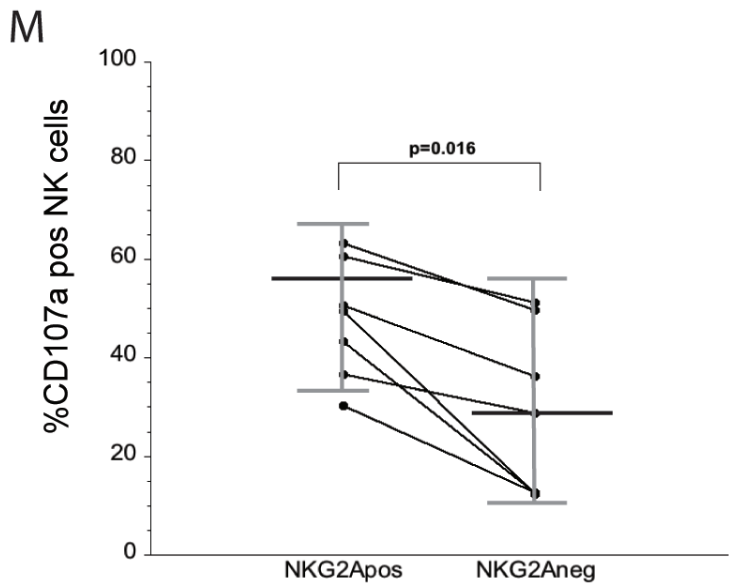

Supplement: ppat.1005421.s001.pdf [file ppat.1005421.s001.pdf]
